# Supplementary material for: Characterization of vaginal microbiota in Thai women
Source: PeerJ. 2018 Nov 21;6:e5977. doi: 10.7717/peerj.5977 (PMC6252066; doi:10.7717/peerj.5977)
Supplement: Table S2 [file peerj-06-5977-s002.xlsx]

## Sheet: S001
The raw data of the classification OTUs information by consensus data from 25 vaginal samples.
Sample No. S001
Phylum	Class	Order	Family	Genus	Species	% ID	Count	DB counters	F:R %	% of total reads	% of valid reads	% of mapped reads	% of mapped reads per primer
Actinobacteria	Actinobacteria	Bifidobacteriales	Bifidobacteriaceae	Gardnerella	vaginalis	99.19 - 100	10723	3617 : 7106	50.21 : 49.79	5.56	6.16	7.14	7.14
Actinobacteria	Actinobacteria	Coriobacteriales	Coriobacteriaceae	Atopobium	vaginae	100 - 100	458	458 : 0	51.53 : 48.47	0.24	0.26	0.31	0.31
Actinobacteria	Actinobacteria	Coriobacteriales	Coriobacteriaceae	Olsenella	umbonata*	99.38 - 99.38	608	608 : 0	39.8 : 60.2	0.32	0.35	0.41	0.41
Bacteroidetes	Bacteroidia	Bacteroidales	Bacteroidaceae	Bacteroides	vulgatus	100 - 100	13	13 : 0	0 : 100	0.01	0.01	0.01	0.01
Bacteroidetes	Bacteroidia	Bacteroidales	Prevotellaceae	Prevotella	bivia	99.11 - 100	555	221 : 334	52.61 : 47.39	0.29	0.32	0.37	0.37
Bacteroidetes	Bacteroidia	Bacteroidales	Prevotellaceae	Prevotella	disiens	99.11 - 100	31	12 : 19	61.29 : 38.71	0.02	0.02	0.02	0.02
Bacteroidetes	Bacteroidia	Bacteroidales	Prevotellaceae	Prevotella	timonensis	99.09 - 100	638	638 : 0	53.92 : 46.08	0.33	0.37	0.43	0.43
Firmicutes	Bacilli	Lactobacillales	Lactobacillaceae	Lactobacillus	fornicalis	100 - 100	37	37 : 0	37.84 : 62.16	0.02	0.02	0.02	0.02
Firmicutes	Bacilli	Lactobacillales	Lactobacillaceae	Lactobacillus	iners	99.1 - 100	120230	119985 : 245	49.62 : 50.38	62.31	69.07	80.1	80.1
Firmicutes	Bacilli	Lactobacillales	Lactobacillaceae	Lactobacillus	jensenii	99.55 - 100	3008	3008 : 0	41.16 : 58.84	1.56	1.73	2	2
Firmicutes	Bacilli	Lactobacillales	Lactobacillaceae	Lactobacillus	sp.	99.44 - 99.44	108	0 : 108	62.04 : 37.96	0.06	0.06	0.07	0.07
Firmicutes	Bacilli	Lactobacillales	Lactobacillaceae	Lactobacillus	vaginalis	100 - 100	21	21 : 0	100 : 0	0.01	0.01	0.01	0.01
Firmicutes	Clostridia	Clostridiales	Clostridiales Family XI. Incertae Sedis	Anaerococcus	vaginalis	100 - 100	11	11 : 0	100 : 0	0.01	0.01	0.01	0.01
Firmicutes	Clostridia	Clostridiales	Clostridiales Family XI. Incertae Sedis	Finegoldia	magna	99.21 - 100	553	553 : 0	62.03 : 37.97	0.29	0.32	0.37	0.37
Firmicutes	Clostridia	Clostridiales	Clostridiales Family XI. Incertae Sedis	Peptoniphilus	harei	100 - 100	11	11 : 0	100 : 0	0.01	0.01	0.01	0.01
Firmicutes	Clostridia	Clostridiales	Peptostreptococcaceae	Peptostreptococcus	anaerobius	100 - 100	28	28 : 0	50 : 50	0.01	0.02	0.02	0.02
Remarks		% ID:	% Identity
		Count:	Total mapped reads count
		DB counters:	How many reads matched sequences in each database.
			For example: 3617:7106 means that 3617 reads matched sequences in the MicroSEQ™ database and 7106 reads matched sequences in the Greengenes database.
		F:R %:	Forward : Reverse % found
			*In case of unusual microorganism, the sequence reads were reanalyzed by BLAST with the NCBI taxonomy database.
			BLAST with the MicroSEQ® 16S Reference Library v2013.1 and the Greengenes v13.5 database	BLAST with NCBI database (≥99% identity with highest max score)
			Olsenella_umbonata	Atopobium vaginae strain (100% identity)
				Olsenella umbonata strain (99% identity)
			Olsenella_profusa	Atopobium vaginae strain (99% identity)
				Olsenella profusa strain (99% identity)
			*From the reanalysis with NCBI database, we have corrected our result from Olsenella umbonata and Olsenella profusa to Atpobium vaginae

## Sheet: S002
The raw data of the classification OTUs information by consensus data from 25 vaginal samples.
Sample No. S002
Phylum	Class	Order	Family	Genus	Species	% ID	Count	DB counters	F:R %	% of total reads	% of valid reads	% of mapped reads	% of mapped reads per primer
Actinobacteria	Actinobacteria	Actinomycetales	Corynebacteriaceae	Corynebacterium	pyruviciproducens	100 - 100	12	12 : 0	0 : 100	0.01	0.01	0.01	0.01
Actinobacteria	Actinobacteria	Bifidobacteriales	Bifidobacteriaceae	Gardnerella	vaginalis	99.09 - 100	34319	7687 : 26632	61.77 : 38.23	15.47	18.03	21.07	21.07
Bacteroidetes	Bacteroidia	Bacteroidales	Prevotellaceae	Prevotella	bivia	99.11 - 100	476	107 : 369	53.15 : 46.85	0.21	0.25	0.29	0.29
Firmicutes	Bacilli	Lactobacillales	Streptococcaceae	Streptococcus	anginosus	100 - 100	76	76 : 0	63.16 : 36.84	0.03	0.04	0.05	0.05
Firmicutes	Bacilli	Lactobacillales	Streptococcaceae	Streptococcus	intermedius	99.44 - 99.44	585	585 : 0	47.18 : 52.82	0.26	0.31	0.36	0.36
Firmicutes	Clostridia	Clostridiales	Clostridiales Family XI. Incertae Sedis	Finegoldia	magna	99.35 - 100	74	74 : 0	78.38 : 21.62	0.03	0.04	0.05	0.05
Firmicutes	Clostridia	Clostridiales	Peptostreptococcaceae	Peptostreptococcus	anaerobius	100 - 100	14	14 : 0	100 : 0	0.01	0.01	0.01	0.01
Firmicutes	Negativicutes	Selenomonadales	Veillonellaceae	Dialister	micraerophilus	99.44 - 100	371	371 : 0	52.83 : 47.17	0.17	0.19	0.23	0.23
Proteobacteria	Gammaproteobacteria	Pseudomonadales	Pseudomonadaceae	Pseudomonas	stutzeri	99.09 - 100	1398	1398 : 0	50.72 : 49.28	0.63	0.73	0.86	0.86

## Sheet: S003
The raw data of the classification OTUs information by consensus data from 25 vaginal samples.
Sample No. S003
Phylum	Class	Order	Family	Genus	Species	% ID	Count	DB counters	F:R %	% of total reads	% of valid reads	% of mapped reads	% of mapped reads per primer
Actinobacteria	Actinobacteria	Bifidobacteriales	Bifidobacteriaceae	Gardnerella	vaginalis	99.1 - 100	8985	6271 : 2714	46.19 : 53.81	4.59	5.56	6.92	6.92
Actinobacteria	Actinobacteria	Coriobacteriales	Coriobacteriaceae	Atopobium	vaginae	99.08 - 100	33228	33228 : 0	47.75 : 52.25	16.99	20.58	25.58	25.58
Actinobacteria	Actinobacteria	Coriobacteriales	Coriobacteriaceae	Olsenella	profusa*	99.38 - 99.38	30	30 : 0	46.67 : 53.33	0.02	0.02	0.02	0.02
Actinobacteria	Actinobacteria	Coriobacteriales	Coriobacteriaceae	Olsenella	umbonata*	99.36 - 100	17665	17665 : 0	0.2 : 99.8	9.03	10.94	13.6	13.6
Firmicutes	Bacilli	Lactobacillales	Lactobacillaceae	Lactobacillus	futsaii	99.55 - 100	1349	1349 : 0	54.71 : 45.29	0.69	0.84	1.04	1.04
Proteobacteria	Gammaproteobacteria	Pseudomonadales	Pseudomonadaceae	Pseudomonas	stutzeri	99.54 - 100	1515	1515 : 0	54.19 : 45.81	0.77	0.94	1.17	1.17
Tenericutes	Mollicutes	Mycoplasmatales	Mycoplasmataceae	Ureaplasma	parvum	100 - 100	123	123 : 0	54.47 : 45.53	0.06	0.08	0.09	0.09

## Sheet: S004
The raw data of the classification OTUs information by consensus data from 25 vaginal samples.
Sample No. S004
Phylum	Class	Order	Family	Genus	Species	% ID	Count	DB counters	F:R %	% of total reads	% of valid reads	% of mapped reads	% of mapped reads per primer
Actinobacteria	Actinobacteria	Bifidobacteriales	Bifidobacteriaceae	Gardnerella	vaginalis	99.19 - 100	15110	7870 : 7240	48.46 : 51.54	10.83	13.54	17.24	17.24
Actinobacteria	Actinobacteria	Coriobacteriales	Coriobacteriaceae	Atopobium	vaginae	99.09 - 100	23496	23496 : 0	46.41 : 53.59	16.83	21.06	26.8	26.8
Actinobacteria	Actinobacteria	Coriobacteriales	Coriobacteriaceae	Olsenella	profusa*	99.38 - 99.38	13	13 : 0	0 : 100	0.01	0.01	0.01	0.01
Actinobacteria	Actinobacteria	Coriobacteriales	Coriobacteriaceae	Olsenella	umbonata*	99.36 - 100	20750	20750 : 0	28.77 : 71.23	14.87	18.6	23.67	23.67
Bacteroidetes	Bacteroidia	Bacteroidales	Prevotellaceae	Prevotella	timonensis	99.42 - 100	173	173 : 0	42.77 : 57.23	0.12	0.16	0.2	0.2
Firmicutes	Bacilli	Lactobacillales	Aerococcaceae	Facklamia	ignava	100 - 100	26	26 : 0	50 : 50	0.02	0.02	0.03	0.03
Firmicutes	Bacilli	Lactobacillales	Lactobacillaceae	Lactobacillus	crispatus	100 - 100	27	27 : 0	40.74 : 59.26	0.02	0.02	0.03	0.03
Firmicutes	Bacilli	Lactobacillales	Lactobacillaceae	Lactobacillus	johnsonii	100 - 100	56	56 : 0	53.57 : 46.43	0.04	0.05	0.06	0.06
Firmicutes	Clostridia	Clostridiales	Clostridiales Family XI. Incertae Sedis	Anaerococcus	hydrogenalis	99.34 - 99.34	113	113 : 0	57.52 : 42.48	0.08	0.1	0.13	0.13
Firmicutes	Clostridia	Clostridiales	Clostridiales Family XI. Incertae Sedis	Anaerococcus	lactolyticus	100 - 100	166	166 : 0	46.99 : 53.01	0.12	0.15	0.19	0.19
Firmicutes	Clostridia	Clostridiales	Clostridiales Family XI. Incertae Sedis	Finegoldia	magna	99.35 - 100	120	120 : 0	75.83 : 24.17	0.09	0.11	0.14	0.14
Firmicutes	Clostridia	Clostridiales	Clostridiales Family XI. Incertae Sedis	Peptoniphilus	harei	99.56 - 100	46	46 : 0	23.91 : 76.09	0.03	0.04	0.05	0.05
Firmicutes	Clostridia	Clostridiales	Peptoniphilaceae	Anaerococcus	hydrogenalis	99.56 - 99.56	21	0 : 21	47.62 : 52.38	0.02	0.02	0.02	0.02
Firmicutes	Negativicutes	Selenomonadales	Veillonellaceae	Dialister	micraerophilus	100 - 100	16	16 : 0	100 : 0	0.01	0.01	0.02	0.02
Tenericutes	Mollicutes	Mycoplasmatales	Mycoplasmataceae	Ureaplasma	parvum	100 - 100	161	161 : 0	48.45 : 51.55	0.12	0.14	0.18	0.18

## Sheet: S005
The raw data of the classification OTUs information by consensus data from 25 vaginal samples.
Sample No. S005
Phylum	Class	Order	Family	Genus	Species	% ID	Count	DB counters	F:R %	% of total reads	% of valid reads	% of mapped reads	% of mapped reads per primer
Firmicutes	Bacilli	Lactobacillales	Lactobacillaceae	Lactobacillus	crispatus	99.13 - 100	1267	1255 : 12	36.23 : 63.77	0.76	0.83	0.92	0.92
Firmicutes	Bacilli	Lactobacillales	Lactobacillaceae	Lactobacillus	helveticus	99.44 - 99.44	11	0 : 11	100 : 0	0.01	0.01	0.01	0.01
Firmicutes	Bacilli	Lactobacillales	Lactobacillaceae	Lactobacillus	iners	99.44 - 99.44	13	0 : 13	100 : 0	0.01	0.01	0.01	0.01
Firmicutes	Bacilli	Lactobacillales	Lactobacillaceae	Lactobacillus	kefiranofaciens	100 - 100	67	67 : 0	44.78 : 55.22	0.04	0.04	0.05	0.05
Proteobacteria	Gammaproteobacteria	Pseudomonadales	Pseudomonadaceae	Pseudomonas	stutzeri	99.54 - 100	355	355 : 0	50.7 : 49.3	0.21	0.23	0.26	0.26

## Sheet: S006
The raw data of the classification OTUs information by consensus data from 25 vaginal samples.
Sample No. S006
Phylum	Class	Order	Family	Genus	Species	% ID	Count	DB counters	F:R %	% of total reads	% of valid reads	% of mapped reads	% of mapped reads per primer
Firmicutes	Bacilli	Lactobacillales	Lactobacillaceae	Lactobacillus	fornicalis	100 - 100	175	175 : 0	49.71 : 50.29	0.14	0.16	0.19	0.19
Firmicutes	Bacilli	Lactobacillales	Lactobacillaceae	Lactobacillus	iners	99.1 - 100	56277	55814 : 463	53.49 : 46.51	46.31	51.67	62.02	62.02
Firmicutes	Bacilli	Lactobacillales	Lactobacillaceae	Lactobacillus	jensenii	99.1 - 100	7326	7326 : 0	46.25 : 53.75	6.03	6.73	8.07	8.07
Firmicutes	Bacilli	Lactobacillales	Lactobacillaceae	Lactobacillus	kefiranofaciens	100 - 100	24	24 : 0	50 : 50	0.02	0.02	0.03	0.03
Firmicutes	Bacilli	Lactobacillales	Lactobacillaceae	Lactobacillus	sp.	99.44 - 99.44	156	0 : 156	55.77 : 44.23	0.13	0.14	0.17	0.17

## Sheet: S007
The raw data of the classification OTUs information by consensus data from 25 vaginal samples.
Sample No. S007
Phylum	Class	Order	Family	Genus	Species	% ID	Count	DB counters	F:R %	% of total reads	% of valid reads	% of mapped reads	% of mapped reads per primer
Actinobacteria	Actinobacteria	Actinomycetales	Corynebacteriaceae	Corynebacterium	jeikeium	99.39 - 99.39	14	14 : 0	100 : 0	0.01	0.01	0.01	0.01
Actinobacteria	Actinobacteria	Actinomycetales	Corynebacteriaceae	Corynebacterium	sundsvallense	100 - 100	10	10 : 0	0 : 100	0	0	0.01	0.01
Actinobacteria	Actinobacteria	Bifidobacteriales	Bifidobacteriaceae	Gardnerella	vaginalis	99.09 - 100	9969	5264 : 4705	47.63 : 52.37	3.93	4.77	6.42	6.42
Actinobacteria	Actinobacteria	Coriobacteriales	Coriobacteriaceae	Atopobium	sp.	99.59 - 100	371	0 : 371	59.03 : 40.97	0.15	0.18	0.24	0.24
Actinobacteria	Actinobacteria	Coriobacteriales	Coriobacteriaceae	Atopobium	vaginae	99.09 - 100	10397	10397 : 0	50.38 : 49.62	4.1	4.98	6.7	6.7
Actinobacteria	Actinobacteria	Coriobacteriales	Coriobacteriaceae	Olsenella	umbonata*	99.37 - 99.38	10111	10111 : 0	36.09 : 63.91	3.99	4.84	6.51	6.51
Bacteroidetes	Bacteroidia	Bacteroidales	Prevotellaceae	Prevotella	bivia	99.11 - 100	9248	2147 : 7101	53.32 : 46.68	3.65	4.43	5.96	5.96
Bacteroidetes	Bacteroidia	Bacteroidales	Prevotellaceae	Prevotella	buccalis	99.42 - 100	111	0 : 111	60.36 : 39.64	0.04	0.05	0.07	0.07
Bacteroidetes	Bacteroidia	Bacteroidales	Prevotellaceae	Prevotella	melaninogenica	99.1 - 100	6839	6715 : 124	27.27 : 72.73	2.7	3.27	4.4	4.4
Bacteroidetes	Bacteroidia	Bacteroidales	Prevotellaceae	Prevotella	sp.	99.42 - 100	410	0 : 410	48.05 : 51.95	0.16	0.2	0.26	0.26
Bacteroidetes	Bacteroidia	Bacteroidales	Prevotellaceae	Prevotella	timonensis	99.09 - 100	9327	9327 : 0	57.35 : 42.65	3.68	4.47	6.01	6.01
Bacteroidetes	Bacteroidia	Bacteroidales	Prevotellaceae	Prevotella	veroralis	99.11 - 99.55	5258	5258 : 0	43.42 : 56.58	2.08	2.52	3.39	3.39
Firmicutes	Bacilli	Bacillales	Bacillales incertae sedis	Gemella	asaccharolytica	100 - 100	143	143 : 0	50.35 : 49.65	0.06	0.07	0.09	0.09
Firmicutes	Bacilli	Lactobacillales	Aerococcaceae	Aerococcus	christensenii	99.1 - 100	942	360 : 582	54.99 : 45.01	0.37	0.45	0.61	0.61
Firmicutes	Clostridia	Clostridiales	Clostridiales Family XI. Incertae Sedis	Anaerococcus	tetradius	99.09 - 100	79	79 : 0	59.49 : 40.51	0.03	0.04	0.05	0.05
Firmicutes	Clostridia	Clostridiales	Peptoniphilaceae	Parvimonas	sp.	99.35 - 99.35	4978	0 : 4978	60.49 : 39.51	1.96	2.38	3.21	3.21
Firmicutes	Clostridia	Clostridiales	Ruminococcaceae	Mageeibacillus	indolicus	99.35 - 100	5437	0 : 5437	52.55 : 47.45	2.15	2.6	3.5	3.5
Firmicutes	Negativicutes	Selenomonadales	Veillonellaceae	Dialister	micraerophilus	99.44 - 100	639	639 : 0	56.03 : 43.97	0.25	0.31	0.41	0.41
Firmicutes	Negativicutes	Selenomonadales	Veillonellaceae	Megasphaera	genomosp.	99.45 - 99.45	359	0 : 359	0 : 100	0.14	0.17	0.23	0.23
Firmicutes	Negativicutes	Selenomonadales	Veillonellaceae	Megasphaera	sp.	99.44 - 100	3878	0 : 3878	53.27 : 46.73	1.53	1.86	2.5	2.5
Fusobacteria	Fusobacteriia	Fusobacteriales	Leptotrichiaceae	Sneathia	amnionii	99.54 - 100	1171	0 : 1171	46.97 : 53.03	0.46	0.56	0.75	0.75
Fusobacteria	Fusobacteriia	Fusobacteriales	Leptotrichiaceae	Sneathia	sanguinegens	99.1 - 100	600	567 : 33	46.67 : 53.33	0.24	0.29	0.39	0.39
Tenericutes	Mollicutes	Mycoplasmatales	Mycoplasmataceae	Mycoplasma	hominis	100 - 100	85	85 : 0	54.12 : 45.88	0.03	0.04	0.05	0.05
Tenericutes	Mollicutes	Mycoplasmatales	Mycoplasmataceae	Ureaplasma	urealyticum	100 - 100	31	31 : 0	58.06 : 41.94	0.01	0.01	0.02	0.02

## Sheet: S008
The raw data of the classification OTUs information by consensus data from 25 vaginal samples.
Sample No. S008
Phylum	Class	Order	Family	Genus	Species	% ID	Count	DB counters	F:R %	% of total reads	% of valid reads	% of mapped reads	% of mapped reads per primer
Actinobacteria	Actinobacteria	Bifidobacteriales	Bifidobacteriaceae	Gardnerella	vaginalis	99.59 - 100	114	24 : 90	49.12 : 50.88	0.06	0.07	0.08	0.08
Firmicutes	Bacilli	Lactobacillales	Lactobacillaceae	Lactobacillus	iners	99.08 - 100	130790	118089 : 12701	54.81 : 45.19	71.41	78.58	90.92	90.92
Firmicutes	Bacilli	Lactobacillales	Streptococcaceae	Streptococcus	intermedius	99.44 - 99.44	13	13 : 0	100 : 0	0.01	0.01	0.01	0.01
Proteobacteria	Gammaproteobacteria	Pseudomonadales	Pseudomonadaceae	Pseudomonas	stutzeri	99.54 - 100	2409	2409 : 0	55.92 : 44.08	1.32	1.45	1.67	1.67
Tenericutes	Mollicutes	Mycoplasmatales	Mycoplasmataceae	Ureaplasma	parvum	100 - 100	51	51 : 0	52.94 : 47.06	0.03	0.03	0.04	0.04

## Sheet: S009
The raw data of the classification OTUs information by consensus data from 25 vaginal samples.
Sample No. S009
Phylum	Class	Order	Family	Genus	Species	% ID	Count	DB counters	F:R %	% of total reads	% of valid reads	% of mapped reads	% of mapped reads per primer
Actinobacteria	Actinobacteria	Bifidobacteriales	Bifidobacteriaceae	Bifidobacterium	breve	99.22 - 100	3983	3983 : 0	44.89 : 55.11	1.9	2.15	2.53	2.53
Firmicutes	Bacilli	Lactobacillales	Lactobacillaceae	Lactobacillus	gasseri	99.44 - 100	46323	46323 : 0	51.98 : 48.02	22.15	25.04	29.46	29.46
Firmicutes	Bacilli	Lactobacillales	Lactobacillaceae	Lactobacillus	iners	100 - 100	23	23 : 0	52.17 : 47.83	0.01	0.01	0.01	0.01
Firmicutes	Bacilli	Lactobacillales	Lactobacillaceae	Lactobacillus	johnsonii	100 - 100	12	12 : 0	100 : 0	0.01	0.01	0.01	0.01
Firmicutes	Bacilli	Lactobacillales	Lactobacillaceae	Lactobacillus	paracasei	99.55 - 100	72	72 : 0	44.44 : 55.56	0.03	0.04	0.05	0.05
Firmicutes	Bacilli	Lactobacillales	Lactobacillaceae	Lactobacillus	taiwanensis	100 - 100	45	45 : 0	46.67 : 53.33	0.02	0.02	0.03	0.03
Proteobacteria	Gammaproteobacteria	Pseudomonadales	Pseudomonadaceae	Pseudomonas	stutzeri	99.08 - 100	8188	8188 : 0	49.63 : 50.37	3.92	4.43	5.21	5.21

## Sheet: S010
The raw data of the classification OTUs information by consensus data from 25 vaginal samples.
Sample No. S010
Phylum	Class	Order	Family	Genus	Species	% ID	Count	DB counters	F:R %	% of total reads	% of valid reads	% of mapped reads	% of mapped reads per primer
Firmicutes	Bacilli	Lactobacillales	Lactobacillaceae	Lactobacillus	crispatus	100 - 100	147	147 : 0	40.82 : 59.18	0.14	0.15	0.18	0.18
Firmicutes	Bacilli	Lactobacillales	Lactobacillaceae	Lactobacillus	iners	99.1 - 100	42659	42486 : 173	50.64 : 49.36	39.48	44	52.52	52.52
Firmicutes	Bacilli	Lactobacillales	Lactobacillaceae	Lactobacillus	kefiranofaciens	100 - 100	15	15 : 0	0 : 100	0.01	0.02	0.02	0.02
Firmicutes	Bacilli	Lactobacillales	Lactobacillaceae	Lactobacillus	sp.	99.44 - 99.44	171	0 : 171	52.05 : 47.95	0.16	0.18	0.21	0.21
Tenericutes	Mollicutes	Mycoplasmatales	Mycoplasmataceae	Ureaplasma	parvum	100 - 100	26	26 : 0	61.54 : 38.46	0.02	0.03	0.03	0.03

[truncated: 15 more sheets: S011, S012, S013, S014, S015, S016, S017, S018, S019, S020, S021, S022, S023, S024, S025]
